# Supplementary material for: Low-Symmetry Mixed Fluorinated Subphthalocyanines as Fluorescence Imaging Probes in MDA-MB-231 Breast Tumor Cells
Source: MDPI journal article supplement (doi:10.3390/ijms18061177), 2017-06-01
Supplement: s1 [file s1]

Supplementary material for:

**Low-symmetry mixed fluorinated subphthalocyanines as fluorescence imaging probes in MDA-MB-231 breast tumor cells.**

Katherine J. McAuliffe,<sup>1</sup> Megan A. Kaster,<sup>1</sup> Regina G. Szlag,<sup>1</sup> and Evan R. Trivedi.<sup>1\*</sup>

<sup>1</sup>Oakland University, Department of Chemistry, Rochester, MI 48309, USA

\*Corresponding author: trivedi@oakland.edu

Purity results peak 1 at 3.434 min.

Signal DAD1 A, Sig=254,4 Ref=off (RW\RW 2017-05-09 11-40-17\071-0101.D)

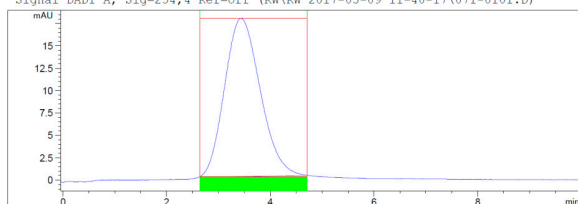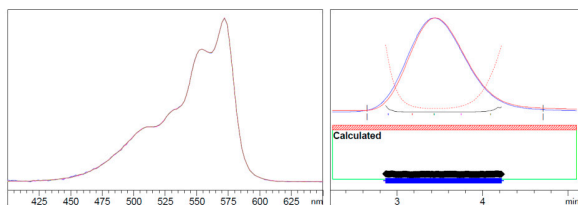

-> The purity factor is within the calculated threshold limit. <-

Purity factor : 999.986 (204 of 204 spectra are within the calculated threshold limit.)  
 Threshold : 999.384 (Calculated with 204 of 204 spectra)  
 Reference : Peak start and end spectra (integrated) (2.646 / 4.706)  
 Spectra : 5 (Selection automatic, 5)  
 Noise Threshold: 0.100 (Set by user)

\*\*\* End of Report \*\*\*

**Figure S1 – Purity report for SPc(AB<sub>2</sub>).**

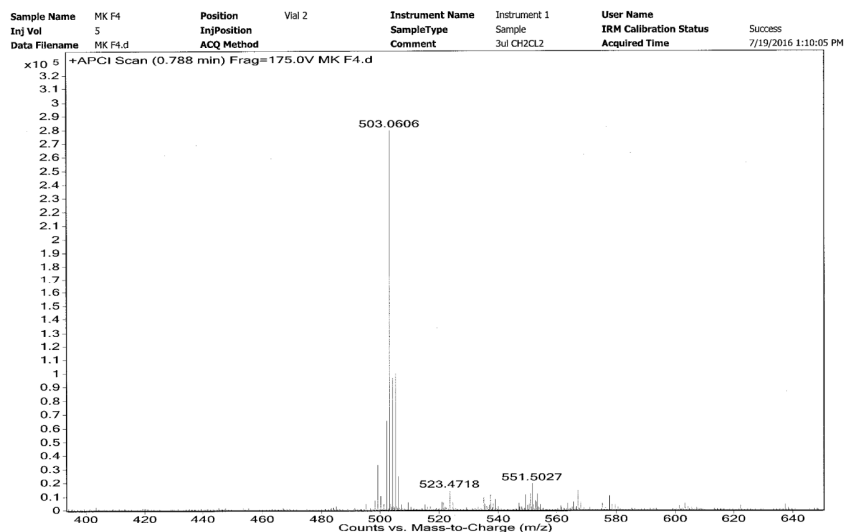

**Figure S2 – HR-APCI-MS spectrum for SPc(AB<sub>2</sub>).**

Purity results peak 1 at 3.099 min.

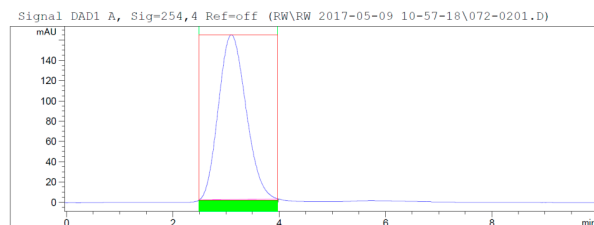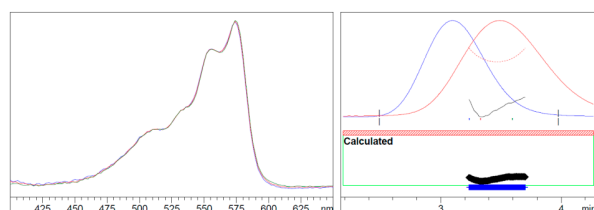

-> The purity factor is within the calculated threshold limit. <-

Purity factor : 999.739 (71 of 71 spectra are within the calculated threshold limit.)  
 Threshold : 996.054 (Calculated with 71 of 71 spectra)  
 Reference : Peak start and end spectra (integrated) (2.488 / 3.975)  
 Spectra : 3 (Selection automatic, 5)  
 Noise Threshold: 0.100 (Set by user)

\*\*\* End of Report \*\*\*

**Figure S3 – Purity report for SPc(A<sub>2</sub>B)**

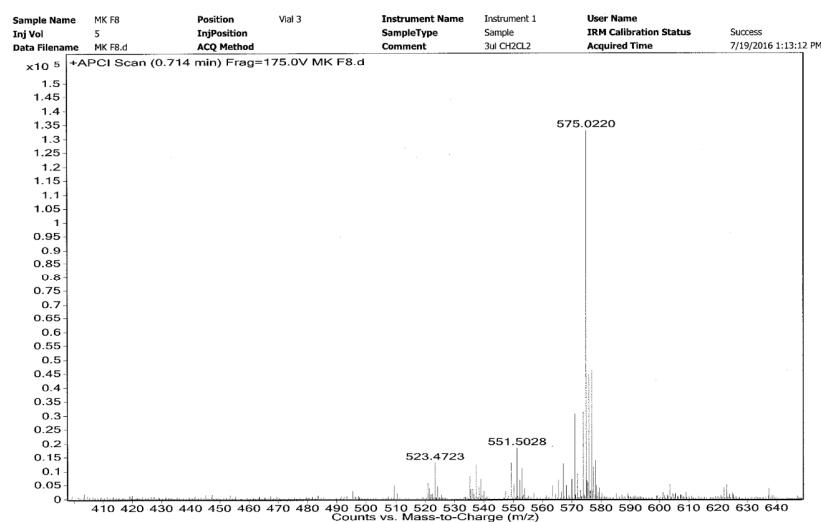

**Figure S4 – HR-APCI-MS spectrum for SPc(A<sub>2</sub>B).**

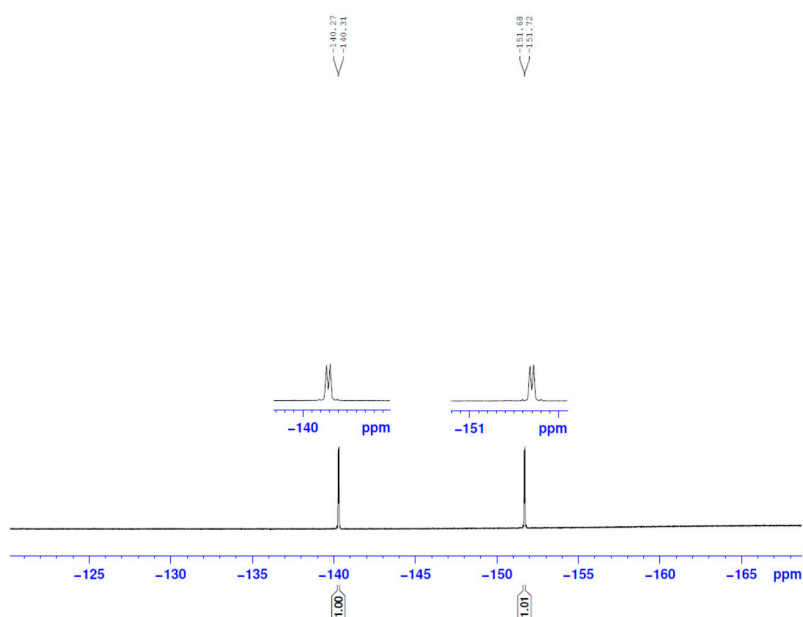

Figure S5 –  $^{19}\text{F}$  NMR spectrum for SPc(AB<sub>2</sub>)

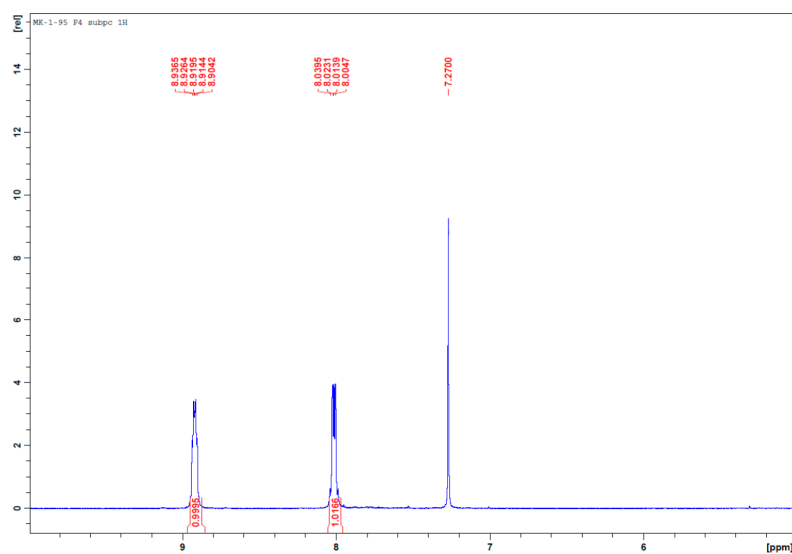

Figure S6 –  $^1\text{H}$  NMR spectrum for SPc(AB<sub>2</sub>) showing two sets of overlapping multiplets.

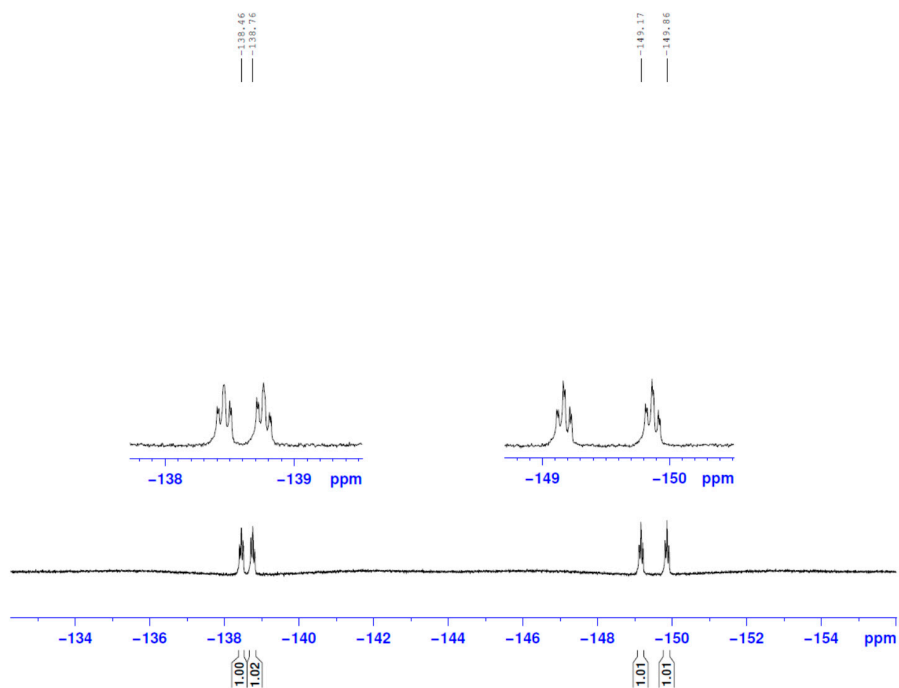

Figure S7 –  $^{19}\text{F}$  NMR spectrum for SPc(A<sub>2</sub>B)

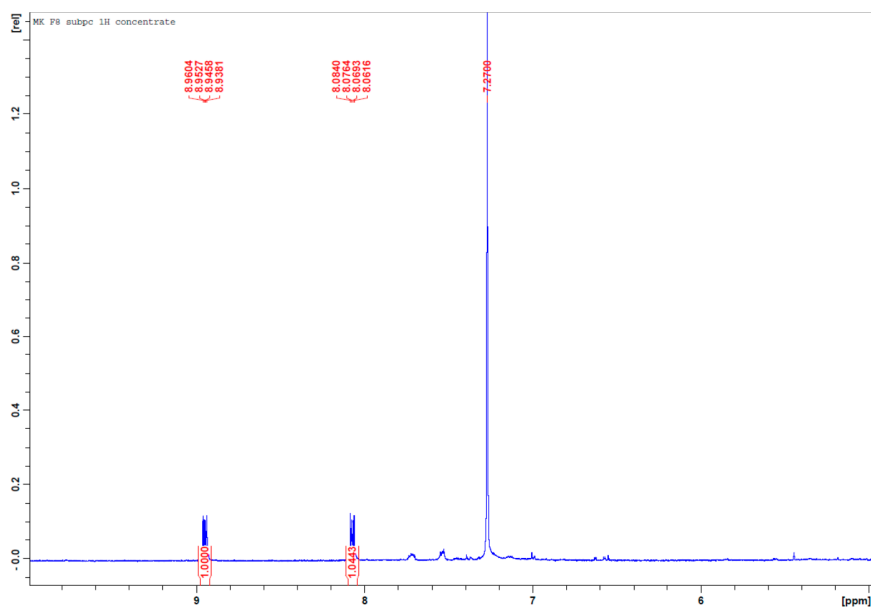

Figure S8 –  $^1\text{H}$  NMR spectrum for SPc(A<sub>2</sub>B) showing two doublets of doublets (ortho and meta coupling).
